# Supplementary material
Source: HighWire-hosted journal article supplement (https://tobaccocontrol.bmj.com/content/tc-2022-057905)
Supplement: inline-supplementary-material-3 [file inline-supplementary-material-3.pdf]

### A. Youth 2015–2017 (Waves 2–4)

|      |                       | To                    |                     |                     |                      |                  |
|------|-----------------------|-----------------------|---------------------|---------------------|----------------------|------------------|
|      |                       | Never established use | Non-current use     | Cigarette-only use  | E-cigarette-only use | Dual use         |
| From | Never established use | 95.4<br>(95.1,95.8)   | 2.2<br>(2.0,2.5)    | 0.5<br>(0.4,0.6)    | 1.6<br>(1.4,1.8)     | 0.2<br>(0.1,0.2) |
|      | Non-current use       | 61.6<br>(54.4,68.8)   | 13.7<br>(9.3,18.0)  | 20.7<br>(14.0,27.4) | 4.0<br>(2.7,5.3)     |                  |
|      | Cigarette-only use    | 20.7<br>(15.3,26.2)   | 59.6<br>(51.7,67.6) | 4.6<br>(2.8,6.5)    | 15.0<br>(8.6,21.5)   |                  |
|      | E-cigarette-only use  | 41.3<br>(34.8,47.9)   | 8.6<br>(6.5,10.7)   | 40.7<br>(34.4,46.9) | 9.4<br>(6.0,12.8)    |                  |
|      | Dual use              | 9.0<br>(5.9,12.1)     | 37.5<br>(27.8,47.1) | 5.2<br>(0.8,9.6)    | 48.3<br>(37.4,59.2)  |                  |

### B. Youth 2017–2019 (Waves 4–5)

|      |                       | To                    |                     |                     |                      |                  |
|------|-----------------------|-----------------------|---------------------|---------------------|----------------------|------------------|
|      |                       | Never established use | Non-current use     | Cigarette-only use  | E-cigarette-only use | Dual use         |
| From | Never established use | 94.6<br>(94.2,95.0)   | 0.9<br>(0.7,1.1)    | 0.4<br>(0.3,0.6)    | 3.8<br>(3.4,4.2)     | 0.3<br>(0.2,0.3) |
|      | Non-current use       | 55.8<br>(47.5,64.0)   | 9.1<br>(5.8,12.3)   | 31.5<br>(24.0,39.1) | 3.7<br>(2.6,4.7)     |                  |
|      | Cigarette-only use    | 10.1<br>(5.3,14.9)    | 60.0<br>(50.7,69.3) | 5.9<br>(3.3,8.5)    | 23.9<br>(16.0,31.9)  |                  |
|      | E-cigarette-only use  | 23.9<br>(18.8,29.1)   | 3.0<br>(1.8,4.1)    | 65.8<br>(60.5,71.1) | 7.3<br>(5.0,9.7)     |                  |
|      | Dual use              | 4.7<br>(2.3,7.1)      | 17.9<br>(5.1,30.7)  | 16.5<br>(6.7,26.3)  | 60.9<br>(43.0,78.8)  |                  |

### C. Adults 2015–2017 (Waves 2–4)

|      |                       | To                    |                     |                     |                      |                  |
|------|-----------------------|-----------------------|---------------------|---------------------|----------------------|------------------|
|      |                       | Never established use | Non-current use     | Cigarette-only use  | E-cigarette-only use | Dual use         |
| From | Never established use | 97.6<br>(97.3,97.9)   | 1.5<br>(1.2,1.7)    | 0.6<br>(0.6,0.7)    | 0.2<br>(0.2,0.3)     | 0.0<br>(0.0,0.0) |
|      | Non-current use       | 94.1<br>(93.5,94.6)   | 4.9<br>(4.4,5.4)    | 0.8<br>(0.6,1.0)    | 0.2<br>(0.2,0.2)     |                  |
|      | Cigarette-only use    | 9.3<br>(8.6,10.0)     | 86.1<br>(85.3,86.8) | 0.9<br>(0.7,1.1)    | 3.7<br>(3.3,4.1)     |                  |
|      | E-cigarette-only use  | 21.7<br>(18.7,24.7)   | 6.9<br>(5.8,8.1)    | 57.8<br>(54.4,61.3) | 13.5<br>(11.3,15.7)  |                  |
|      | Dual use              | 4.5<br>(4.1,5.0)      | 45.3<br>(42.4,48.3) | 10.0<br>(8.3,11.8)  | 40.1<br>(37.0,43.2)  |                  |

### D. Adults 2017–2019 (Waves 4–5)

|      |                       | To                    |                     |                     |                      |                  |
|------|-----------------------|-----------------------|---------------------|---------------------|----------------------|------------------|
|      |                       | Never established use | Non-current use     | Cigarette-only use  | E-cigarette-only use | Dual use         |
| From | Never established use | 98.8<br>(98.6,98.9)   | 0.6<br>(0.5,0.7)    | 0.3<br>(0.2,0.4)    | 0.3<br>(0.3,0.4)     | 0.0<br>(0.0,0.0) |
|      | Non-current use       | 96.3<br>(95.9,96.7)   | 2.6<br>(2.3,2.9)    | 1.0<br>(0.8,1.2)    | 0.1<br>(0.1,0.1)     |                  |
|      | Cigarette-only use    | 6.8<br>(6.2,7.5)      | 88.2<br>(87.3,89.0) | 1.1<br>(0.9,1.4)    | 3.8<br>(3.4,4.2)     |                  |
|      | E-cigarette-only use  | 13.9<br>(11.9,16.0)   | 1.4<br>(1.0,1.7)    | 78.2<br>(76.0,80.4) | 6.5<br>(5.0,8.0)     |                  |
|      | Dual use              | 1.8<br>(1.5,2.1)      | 24.9<br>(21.5,28.3) | 9.5<br>(7.3,11.7)   | 63.8<br>(59.9,67.6)  |                  |
